# Supplementary material for: Excited state proton transfer of triplet state p-nitrophenylphenol to amine and alcohol: a spectroscopic and kinetic study
Source: Royal Society of Chemistry journal article supplement (doi:10.1039/d2cp02503e), 2022-01-01
Supplement: d2cp02503e1.pdf [file d2cp02503e1.pdf]

## Supporting Information

### **Excited State Proton Transfer of Triplet State *p*-Nitrophenylphenol to Amine and Alcohol: A Spectroscopic and Kinetic Study**

Xinghang Pan<sup>a</sup>, Ting Han<sup>a</sup>, Jing Long<sup>a</sup>, Binbin Xie<sup>b</sup>, Yong Du<sup>c</sup>, Yanying Zhao<sup>a,d</sup>, Xuming Zheng<sup>a</sup>,  
Jiadan Xue<sup>\*a,d</sup>

<sup>a</sup>*Department of Chemistry, Zhejiang Sci-Tech University, Hangzhou, 310018, China*

<sup>b</sup>*Zhejiang Normal University, Hangzhou Institute of Advanced Studies, Hangzhou 310018, China*

<sup>c</sup>*Centre for THz Research, China Jiliang University, Hangzhou, 310018, China*

<sup>d</sup>*Key Laboratory of Surface & Interface Science of Polymer Materials of Zhejiang Province, Zhejiang Sci-Tech University, Hangzhou, 310018, China*

## Content

|                                                                                                                                                                                                                                                                                                                                                                                                                                     |    |
|-------------------------------------------------------------------------------------------------------------------------------------------------------------------------------------------------------------------------------------------------------------------------------------------------------------------------------------------------------------------------------------------------------------------------------------|----|
| <b>Figure 1S.</b> (A) UV-Vis spectra evolution for NO <sub>2</sub> -Bp-OH under different pH conditions in MeCN:H <sub>2</sub> O=1:9 (v:v) solution. (B) Absorptions at 328 and 426 nm associated with NO <sub>2</sub> -Bp-OH and its deprotonated form NO <sub>2</sub> -Bp-O <sup>-</sup> .....                                                                                                                                    | 4  |
| <b>Figure 2S.</b> UV-vis absorption spectra of NO <sub>2</sub> -Bp-OH in acetonitrile containing 0.4 mM Bu <sub>4</sub> NOH and varying percentage (v%) of methanol in the solution. ....                                                                                                                                                                                                                                           | 4  |
| <b>Figure 3S.</b> Structures of free NO <sub>2</sub> -Bp-O <sup>-</sup> molecule and two types of hydrogen-bonded complexes: NO <sub>2</sub> -Bp-O <sup>-</sup> ···(H <sub>2</sub> O) <sub>n</sub> (n=1~3) and (H <sub>2</sub> O) <sub>n</sub> ···NO <sub>2</sub> -Bp-O <sup>-</sup> (n=1, 2). ....                                                                                                                                 | 5  |
| <b>Figure 4S.</b> Plot of pseudo first-order decay rate constants of <sup>3</sup> NO <sub>2</sub> -Bp-OH versus concentrations of ferrocene with a linear fit.....                                                                                                                                                                                                                                                                  | 5  |
| <b>Figure 5S.</b> Transient absorption spectra recorded at selected time delays upon excitation of NO <sub>2</sub> -Bp-OH in acetonitrile with <i>t</i> -butylamine (NB) in the solution. Concentrations of NB have been depicted in the graphs.....                                                                                                                                                                                | 6  |
| <b>Figure 6S.</b> The kinetic curves (black) measured at 650 and 490 (480) nm in the presence of various concentrations of <i>t</i> -butylamine (NB). Fitted curves (in red) obtained with a single exponential function (650 nm) and a bi-exponential function (490 nm). The influence of laser pulse duration was also included in those with fast decay. The concentrations of NB are displayed in the corresponding graphs..... | 8  |
| <b>Figure 7S.</b> Transient absorption spectra after excitation of NO <sub>2</sub> -Bp-OH (0.04 mM) in acetonitrile in the presence of 18.9 mM NB under argon purged. (Inserted) the expand view of the 6.0 μs spectrum. ....                                                                                                                                                                                                       | 9  |
| <b>Figure 8S.</b> Plot of pseudo first-order decay rate constants of <sup>3</sup> NO <sub>2</sub> -Bp-OH vs. concentrations of <i>t</i> -butylamine (NB) with a linear fit.....                                                                                                                                                                                                                                                     | 9  |
| <b>Figure 9S.</b> Kinetics at 520 nm at various concentrations of NO <sub>2</sub> -Bp-O <sup>-</sup> in the benzophenone (4.1 mM) sensitization experiments. NO <sub>2</sub> -Bp-O <sup>-</sup> was produced in the presence of Bu <sub>4</sub> NOH, and confirmed by UV-Vis spectra. A bi-exponential function was used to fit the kinetic curve so that the decay time constant could be found accurately. ....                   | 10 |
| <b>Figure 10S.</b> Transient absorption spectra after 355 nm excitation of NO <sub>2</sub> -Bp-O <sup>-</sup> (40 μM) alone in solution. NO <sub>2</sub> -Bp-O <sup>-</sup> was produced in the presence of Bu <sub>4</sub> NOH, and confirmed by UV-Vis spectra. ....                                                                                                                                                              | 11 |
| <b>Figure 11S.</b> (A) Fluorescence spectra of NO <sub>2</sub> -Bp-OH (40 μM) in acetonitrile containing various NB concentration. NO <sub>2</sub> -Bp-O <sup>-</sup> does not produce any detectable emission bands. (B) Normalized fluorescence spectra without NB and with 945 mM NB in solutions. ....                                                                                                                          | 12 |
| NO <sub>2</sub> -Bp-OH has a maximum emission at 534 nm and a quantum yield of 0.004 in acetonitrile. The intensity of fluorescence decreases as NB concentration increases, and no new emission bands are observed. This observation is consistent with the finding that excitation of NO <sub>2</sub> -Bp-O <sup>-</sup> alone in solution does not produce detectable fluorescence.....                                          | 12 |

|                                                                                                                                                                                                                                                                                                                                             |    |
|---------------------------------------------------------------------------------------------------------------------------------------------------------------------------------------------------------------------------------------------------------------------------------------------------------------------------------------------|----|
| <b>Figure 12S.</b> The decay curves (black) of ${}^3\text{NO}_2\text{-Bp-OH}$ monitored at 650 nm in the presence of various concentrations of methanol, the proportion of which is displayed in the graph. The single exponential function (in red) was used to fit the decay kinetics and the time constants are shown in the graphs..... | 13 |
| <b>Figure 13S.</b> Transient absorption spectra recorded at selected time delays upon excitation of $\text{NO}_2\text{-Bp-OH}$ in acetonitrile with ethanol in the solution. The volume proportions of ethanol are displayed in the graphs.....                                                                                             | 14 |
| <b>Figure 14S.</b> The decay curves (black) of ${}^3\text{NO}_2\text{-Bp-OH}$ monitored at 650 nm in the presence of various concentrations of ethanol, the proportion of which is displayed in the graph. The single exponential function (in red) was used to fit the decay kinetics and the time constants are shown in the graphs.....  | 15 |
| <b>Figure 15S.</b> $T_1$ state $\text{NO}_2\text{-Bp-OH}\cdots(\text{MeOH})_n$ ( $n=1\sim 3$ ) hydrogen-bonded complexes in acetonitrile used in the potential energy scan. ....                                                                                                                                                            | 16 |
| <b>Table 1S.</b> Hydrogen bond lengths and hydrogen-bonding energies of $\text{NO}_2\text{-Bp-O}^-\cdots(\text{H}_2\text{O})_n$ ( $n=1\sim 3$ ) and $(\text{H}_2\text{O})_n\cdots\text{NO}_2\text{-Bp-O}^-$ ( $n=1,2$ ) complexes predicted by DFT calculation at the level of B3LYP/6-31+G(d,p) in acetonitrile with PCM model. ....       | 17 |
| <b>Table 2S.</b> Vibrational frequencies of $\text{NO}_2\text{-Bp-O}^-\cdots(\text{H}_2\text{O})_n$ ( $n=1\sim 3$ ) and $(\text{H}_2\text{O})_n\cdots\text{NO}_2\text{-Bp-O}^-$ ( $n=1,2$ ) hydrogen-bonded complex predicted by DFT calculation at the level of B3LYP/6-31+G(d,p). ....                                                    | 18 |
| <b>Table 3S.</b> Selected structural parameters of the $\text{NO}_2\text{-Bp-O}^-\cdots(\text{H}_2\text{O})_n$ ( $n=1\sim 3$ ) and $(\text{H}_2\text{O})_n\cdots\text{NO}_2\text{-Bp-O}^-$ ( $n=1,2$ ) hydrogen-bonded complex predicted by DFT calculation at the level of B3LYP/6-31+G(d,p). <sup>a</sup> .....                           | 19 |
| <b>Determination of the acidity (<math>pK_a^*</math>) of <math>{}^3\text{NO}_2\text{-Bp-OH}</math>.....</b>                                                                                                                                                                                                                                 | 20 |
| <b>References:</b> .....                                                                                                                                                                                                                                                                                                                    | 20 |

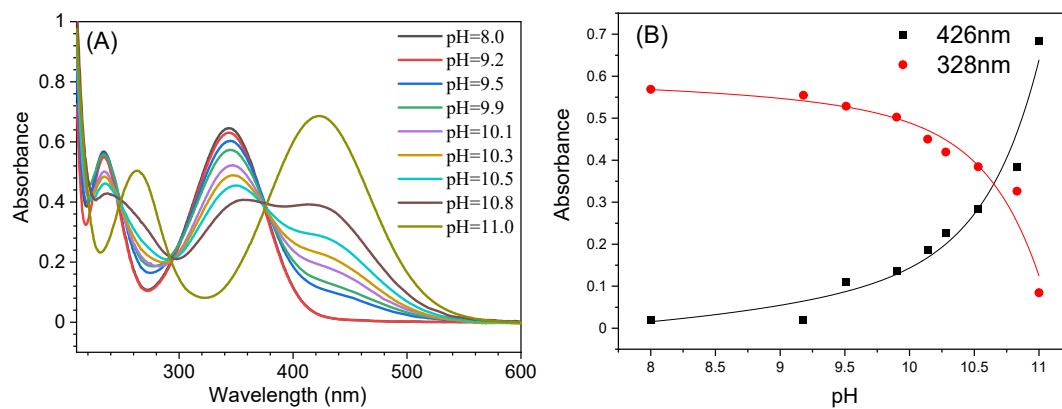

**Figure 1S.** (A) UV-Vis spectra evolution for  $\text{NO}_2\text{-Bp-OH}$  under different pH conditions in  $\text{MeCN:H}_2\text{O}=1:9$  (v:v) solution. (B) Absorptions at 328 and 426 nm associated with  $\text{NO}_2\text{-Bp-OH}$  and its deprotonated form  $\text{NO}_2\text{-Bp-O}^-$ .

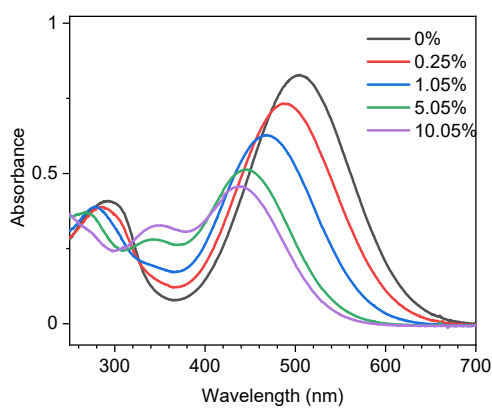

**Figure 2S.** UV-vis absorption spectra of  $\text{NO}_2\text{-Bp-OH}$  in acetonitrile containing  $0.4 \text{ mM Bu}_4\text{NOH}$  and varying percentage (v%) of methanol in the solution.

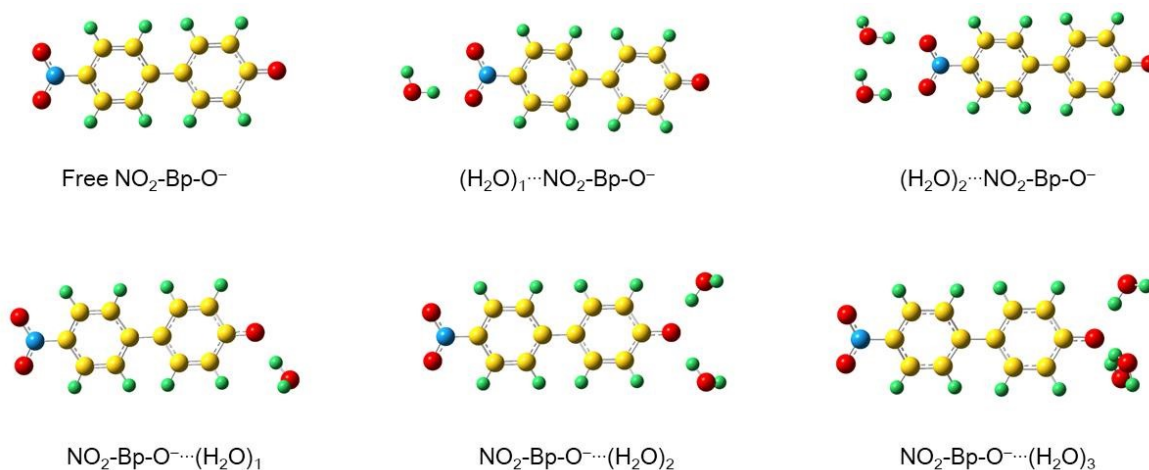

**Figure 3S.** Structures of free NO<sub>2</sub>-Bp-O<sup>-</sup> molecule and two types of hydrogen-bonded complexes: NO<sub>2</sub>-Bp-O<sup>-</sup>⋯(H<sub>2</sub>O)<sub>n</sub> (n=1~3) and (H<sub>2</sub>O)<sub>n</sub>⋯NO<sub>2</sub>-Bp-O<sup>-</sup> (n=1, 2).

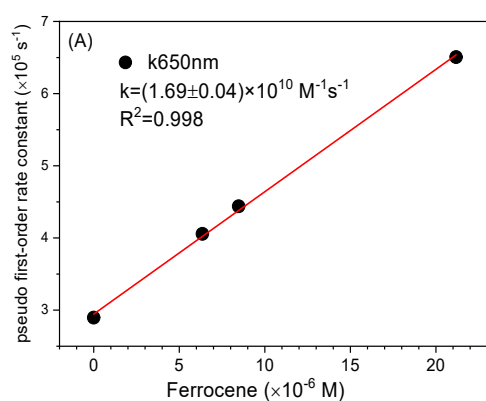

**Figure 4S.** Plot of pseudo first-order decay rate constants of <sup>3</sup>NO<sub>2</sub>-Bp-OH versus concentrations of ferrocene with a linear fit.

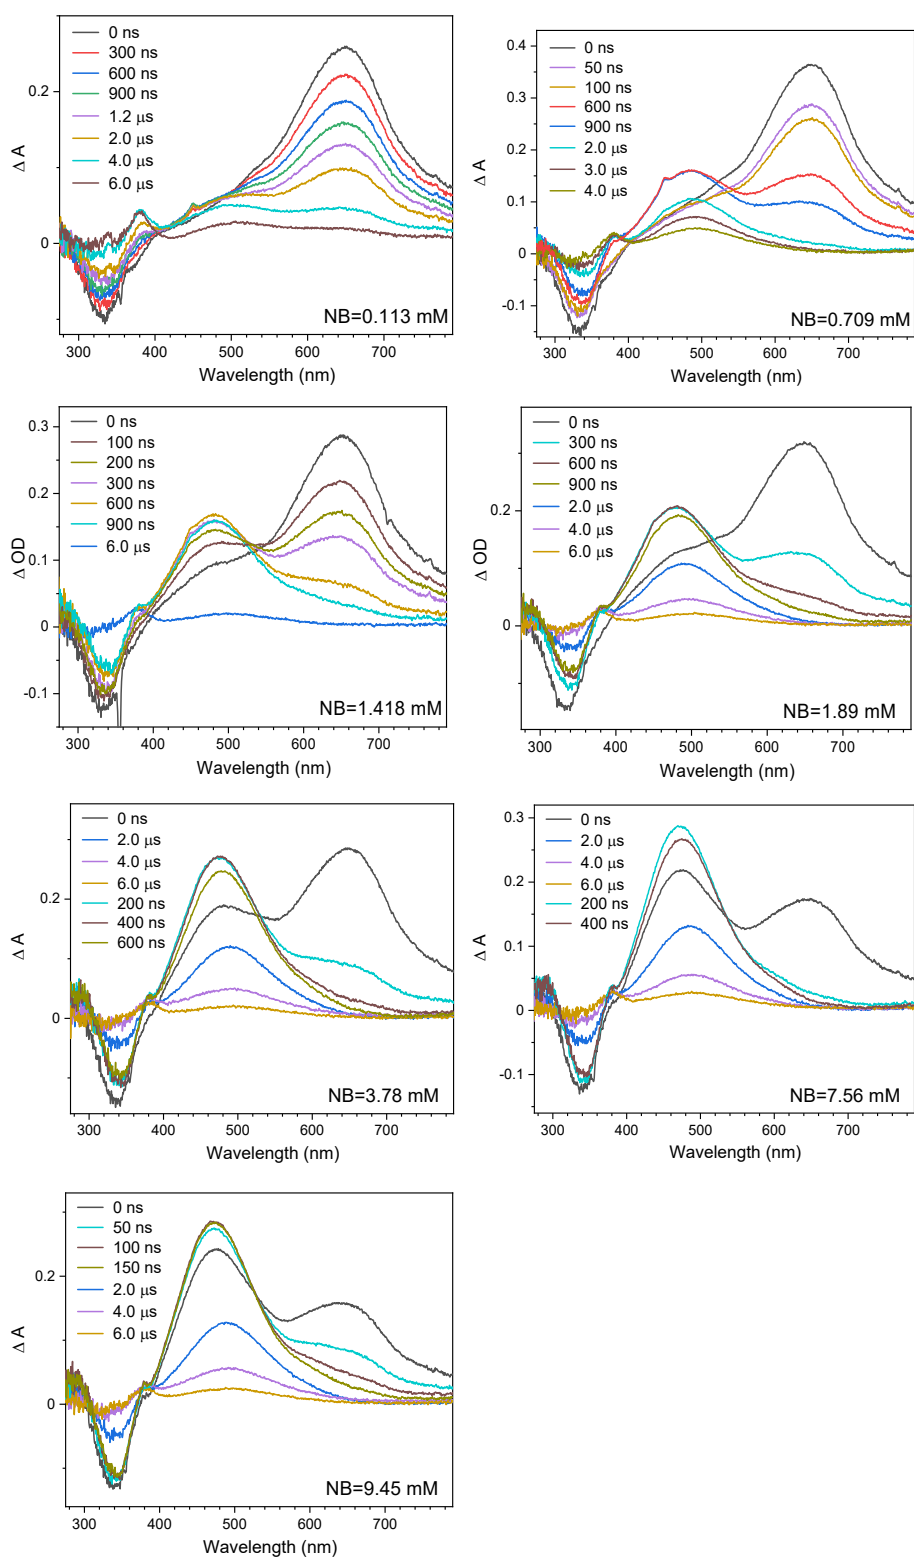

**Figure 5S.** Transient absorption spectra recorded at selected time delays upon excitation of  $\text{NO}_2\text{-Bp-OH}$  in acetonitrile with *t*-butylamine (NB) in the solution. Concentrations of NB have been depicted in the graphs.

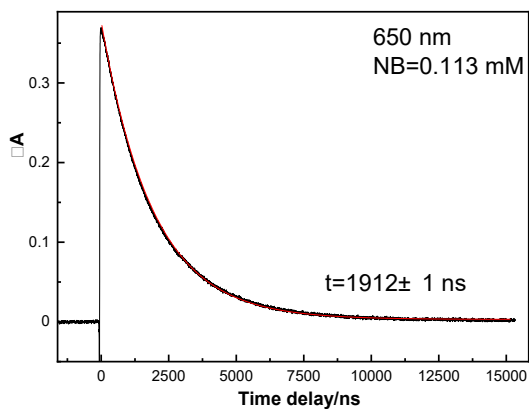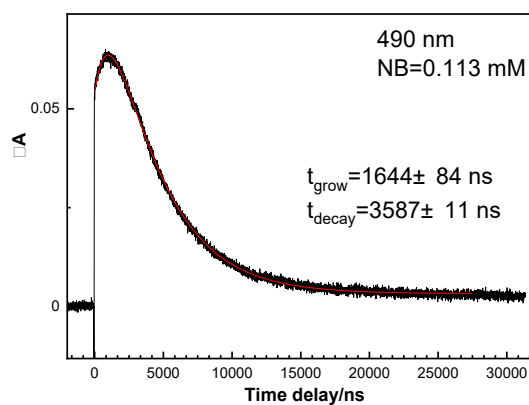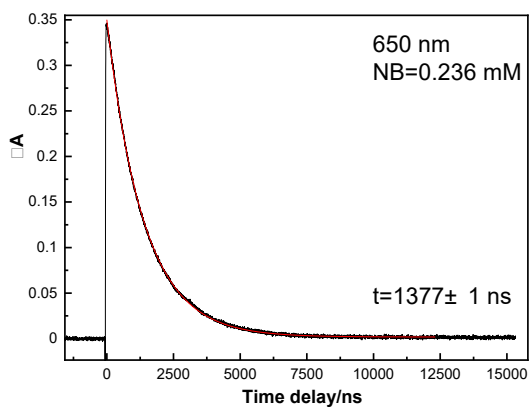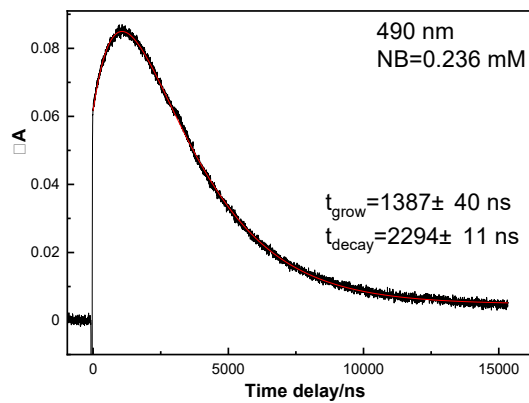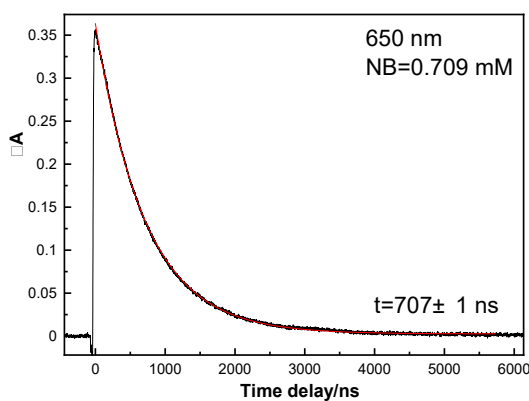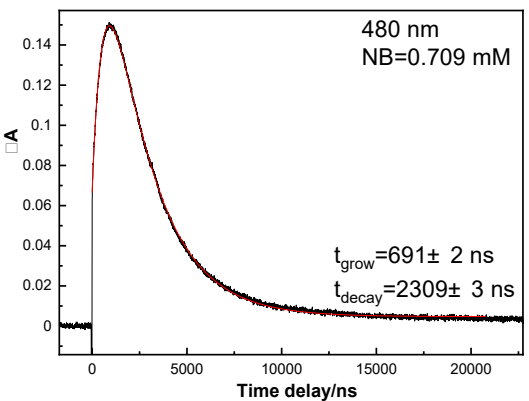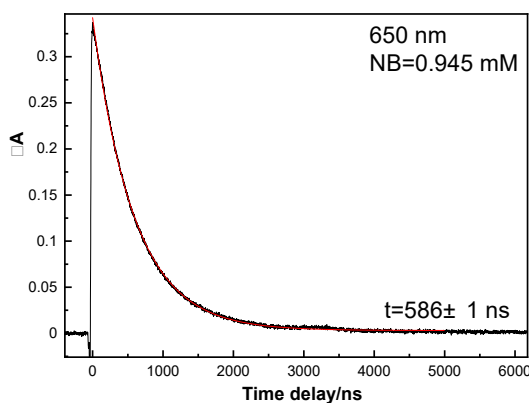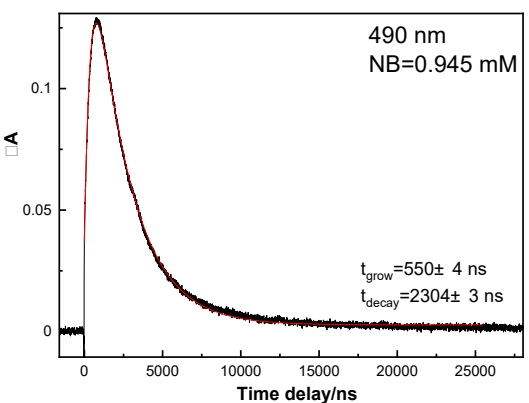

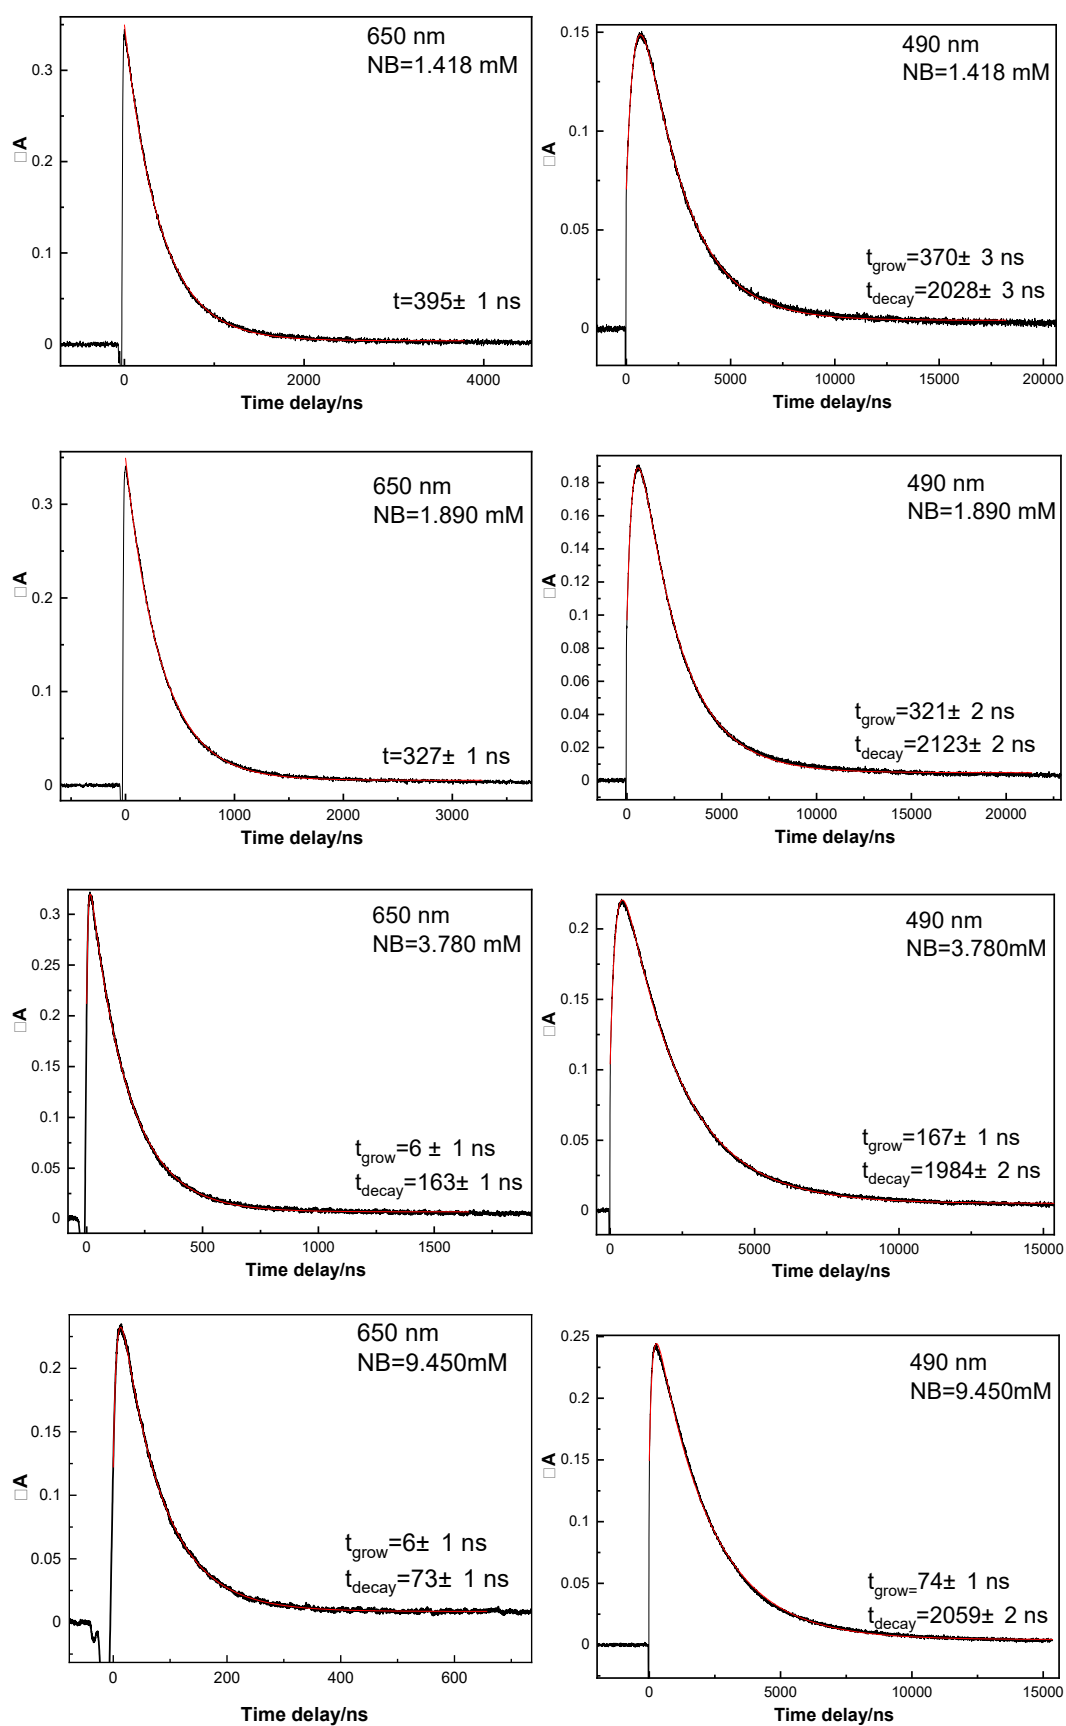

**Figure 6S.** The kinetic curves (black) measured at 650 and 490 (480) nm in the presence of various concentrations of *t*-butylamine (NB). Fitted curves (in red) obtained with a single exponential function (650 nm) and a bi-exponential function (490 nm). The influence of laser pulse duration was also included in those with fast decay. The concentrations of NB are displayed in the corresponding graphs.



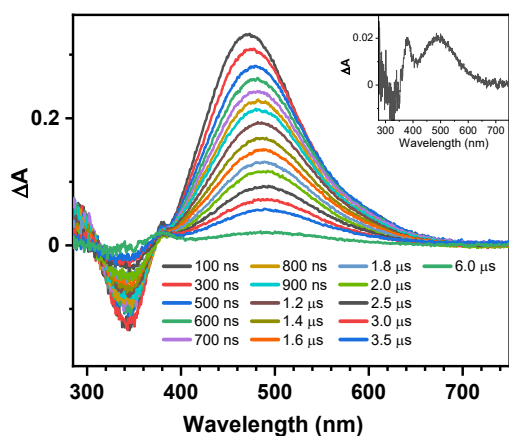

**Figure 7S.** Transient absorption spectra after excitation of  $\text{NO}_2\text{-Bp-OH}$  (0.04 mM) in acetonitrile in the presence of 18.9 mM NB under argon purged. (Inserted) the expand view of the 6.0  $\mu\text{s}$  spectrum.

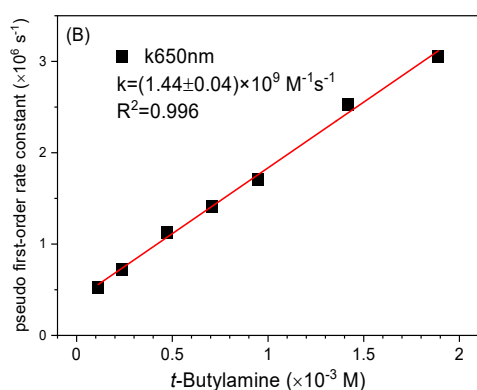

**Figure 8S.** Plot of pseudo first-order decay rate constants of  ${}^3\text{NO}_2\text{-Bp-OH}$  vs. concentrations of *t*-butylamine (NB) with a linear fit.

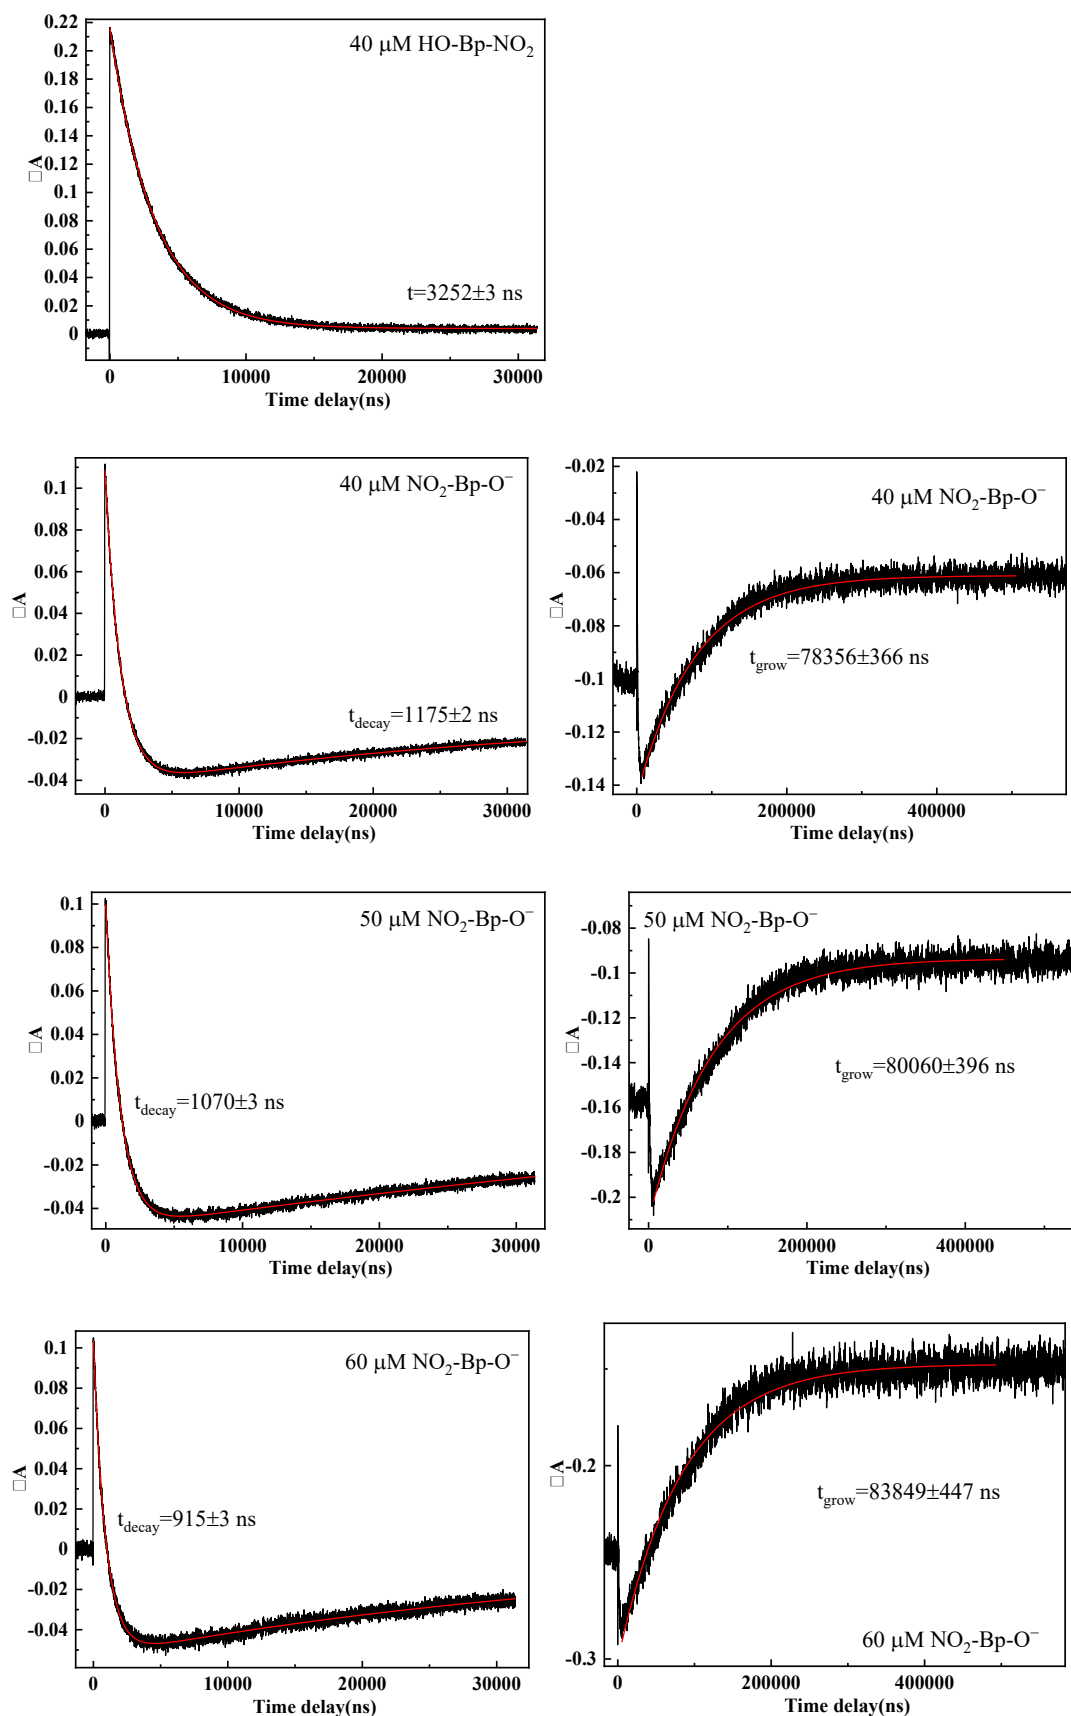

**Figure 9S.** Kinetics at 520 nm at various concentrations of  $\text{NO}_2\text{-Bp-O}^-$  in the benzophenone (4.1 mM) sensitization experiments.  $\text{NO}_2\text{-Bp-O}^-$  was produced in the presence of  $\text{Bu}_4\text{NOH}$ , and confirmed by UV-Vis spectra. A bi-exponential function was used to fit the kinetic curve so that the decay time constant could be found accurately.

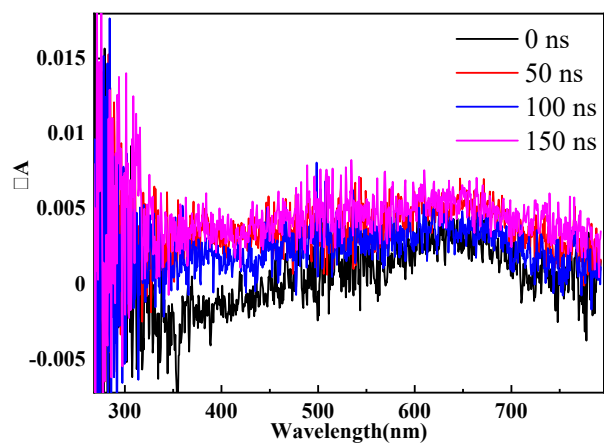

**Figure 10S.** Transient absorption spectra after 355 nm excitation of  $\text{NO}_2\text{-Bp-O}^-$  (40  $\mu\text{M}$ ) alone in solution.  $\text{NO}_2\text{-Bp-O}^-$  was produced in the presence of  $\text{Bu}_4\text{NOH}$ , and confirmed by UV-Vis spectra.

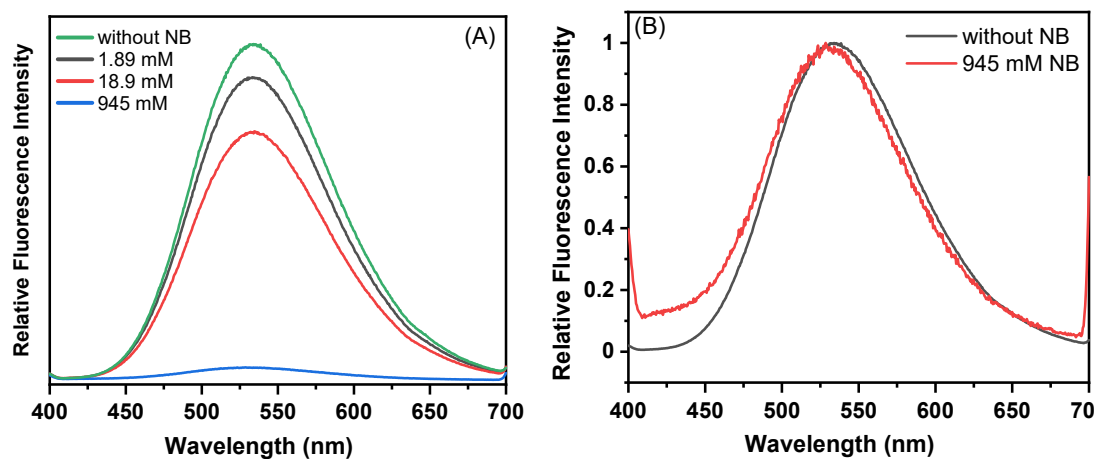

**Figure 11S.** (A) Fluorescence spectra of  $\text{NO}_2\text{-Bp-OH}$  (40  $\mu\text{M}$ ) in acetonitrile containing various NB concentration.  $\text{NO}_2\text{-Bp-O}^-$  does not produce any detectable emission bands. (B) Normalized fluorescence spectra without NB and with 945 mM NB in solutions.

$\text{NO}_2\text{-Bp-OH}$  has a maximum emission at 534 nm and a quantum yield of 0.004 in acetonitrile. The intensity of fluorescence decreases as NB concentration increases, and no new emission bands are observed. This observation is consistent with the finding that excitation of  $\text{NO}_2\text{-Bp-O}^-$  alone in solution does not produce detectable fluorescence.

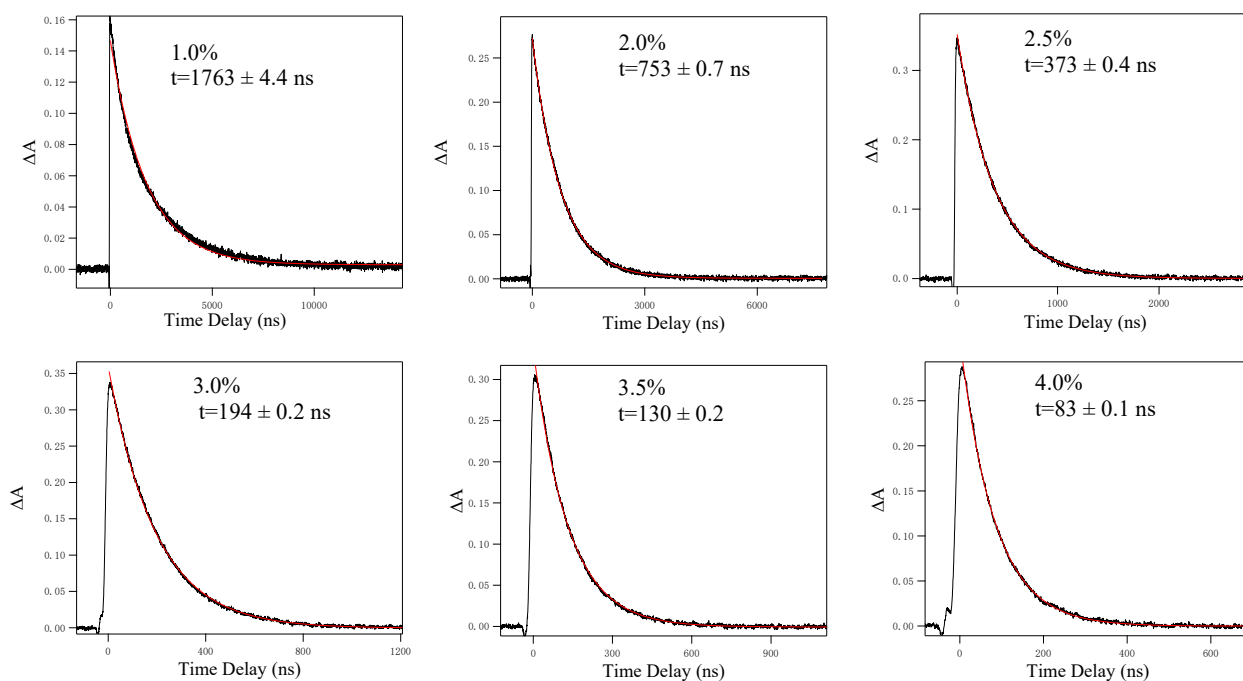

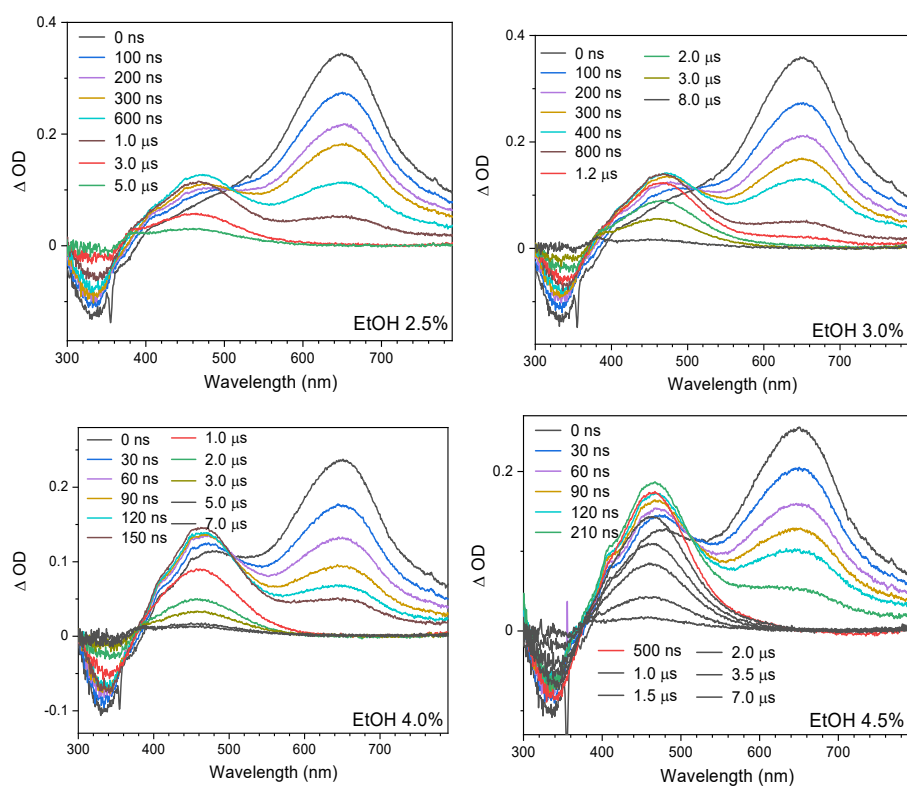

**Figure 13S.** Transient absorption spectra recorded at selected time delays upon excitation of  $\text{NO}_2\text{-Bp-OH}$  in acetonitrile with ethanol in the solution. The volume proportions of ethanol are displayed in the graphs.

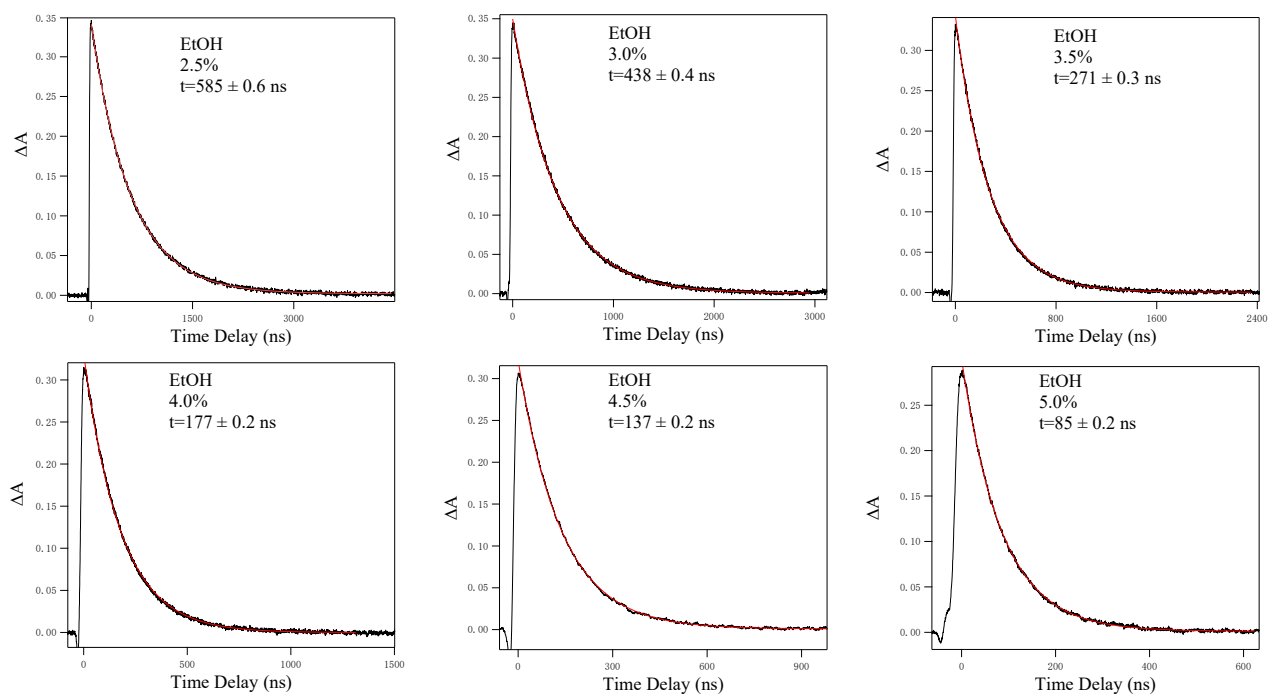

**Figure 14S.** The decay curves (black) of  ${}^3\text{NO}_2\text{-Bp-OH}$  monitored at 650 nm in the presence of various concentrations of ethanol, the proportion of which is displayed in the graph. The single exponential function (in red) was used to fit the decay kinetics and the time constants are shown in the graphs.

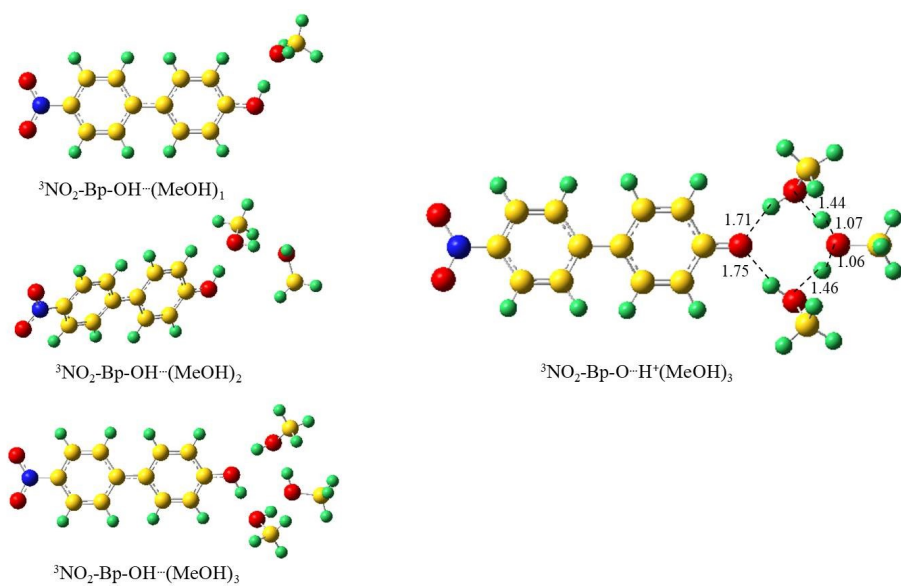

**Figure 15S.**  $T_1$  state  $\text{NO}_2\text{-Bp-OH}\cdots(\text{MeOH})_n$  ( $n=1\sim 3$ ) hydrogen-bonded complexes in acetonitrile used in the potential energy scan.



**Table 1S.** Hydrogen bond lengths and hydrogen-bonding energies of  $\text{NO}_2\text{-Bp-O}^{\cdots}(\text{H}_2\text{O})_n$  ( $n=1\sim 3$ ) and  $(\text{H}_2\text{O})_n\cdots\text{NO}_2\text{-Bp-O}^-$  ( $n=1,2$ ) complexes predicted by DFT calculation at the level of B3LYP/6-31+G(d,p) in acetonitrile with PCM model.

| Complex abbreviation                                     | Hydrogen bond length (Å)   | $\Delta\text{H}$ (kcal/mol) |
|----------------------------------------------------------|----------------------------|-----------------------------|
| $\text{NO}_2\text{-Bp-O}^{\cdots}(\text{H}_2\text{O})_1$ | 1.6567                     | 6.6                         |
| $\text{NO}_2\text{-Bp-O}^{\cdots}(\text{H}_2\text{O})_2$ | 1.6833<br>1.6834           | 12.7                        |
| $\text{NO}_2\text{-Bp-O}^{\cdots}(\text{H}_2\text{O})_3$ | 1.7098<br>1.7303<br>1.7345 | 17.0                        |
| $(\text{H}_2\text{O})_1\cdots\text{NO}_2\text{-Bp-O}^-$  | 1.8862                     | 2.6                         |
| $(\text{H}_2\text{O})_2\cdots\text{NO}_2\text{-Bp-O}^-$  | 1.8644<br>2.0035           | 6.6                         |

**Table 2S.** Vibrational frequencies of  $\text{NO}_2\text{-Bp-O}^-\cdots(\text{H}_2\text{O})_n$  ( $n=1\sim 3$ ) and  $(\text{H}_2\text{O})_n\cdots\text{NO}_2\text{-Bp-O}^-$  ( $n=1,2$ ) hydrogen-bonded complex predicted by DFT calculation at the level of B3LYP/6-31+G(d,p).

| Complex abbreviation                                    | Calc. values (unscaled)    |                |
|---------------------------------------------------------|----------------------------|----------------|
|                                                         | Freq. ( $\text{cm}^{-1}$ ) | Raman Activity |
| Free $\text{NO}_2\text{-Bp-O}^-$                        | 1338                       | 10218          |
|                                                         | 1601                       | 2125           |
| $\text{NO}_2\text{-Bp-O}^-\cdots(\text{H}_2\text{O})_1$ | 1604                       | 9224           |
|                                                         | 1335                       | 8273           |
| $\text{NO}_2\text{-Bp-O}^-\cdots(\text{H}_2\text{O})_2$ | 1607                       | 18327          |
|                                                         | 1332                       | 9982           |
| $\text{NO}_2\text{-Bp-O}^-\cdots(\text{H}_2\text{O})_3$ | 1610                       | 25302          |
|                                                         | 1330                       | 9856           |
| $(\text{H}_2\text{O})_1\cdots\text{NO}_2\text{-Bp-O}^-$ | 1344                       | 9748           |
| $(\text{H}_2\text{O})_2\cdots\text{NO}_2\text{-Bp-O}^-$ | 1348                       | 10658          |

The hydrogen bond at the nitro group causes the (unscaled) frequency of C–C + C–N stretching from  $1338\text{ cm}^{-1}$  in free  $\text{NO}_2\text{-Bp-O}^-$  to  $1344\text{ cm}^{-1}$  for one water and further to  $1348\text{ cm}^{-1}$  for two water in the  $(\text{H}_2\text{O})_n\cdots\text{NO}_2\text{-Bp-O}^-$  ( $n=1, 2$ ) complex.

**Table 3S.** Selected structural parameters of the  $\text{NO}_2\text{-Bp-O}^-\cdots(\text{H}_2\text{O})_n$  ( $n=1\sim 3$ ) and  $(\text{H}_2\text{O})_n\cdots\text{NO}_2\text{-Bp-O}^-$  ( $n=1,2$ ) hydrogen-bonded complex predicted by DFT calculation at the level of B3LYP/6-31+G(d,p).<sup>a</sup>

| Bond length<br>(Å) | Simple<br>anion | CO-1H <sub>2</sub> O | CO-2H <sub>2</sub> O | CO-3H <sub>2</sub> O | NO <sub>2</sub> -2H <sub>2</sub> O |
|--------------------|-----------------|----------------------|----------------------|----------------------|------------------------------------|
| C1-C2              | 1.425           | 1.422                | 1.420                | 1.417                | 1.428                              |
| C2-C3              | 1.382           | 1.384                | 1.385                | 1.386                | 1.379                              |
| C3-C4              | 1.406           | 1.404                | 1.403                | 1.402                | 1.411                              |
| C4-C5              | 1.406           | 1.404                | 1.403                | 1.402                | 1.411                              |
| C5-C6              | 1.382           | 1.384                | 1.385                | 1.386                | 1.379                              |
| C6-C1              | 1.425           | 1.422                | 1.420                | 1.417                | 1.429                              |
| C1-C7              | 1.456           | 1.461                | 1.465                | 1.470                | 1.449                              |
| C7-C8              | 1.423           | 1.420                | 1.417                | 1.414                | 1.427                              |
| C8-C9              | 1.380           | 1.383                | 1.385                | 1.388                | 1.377                              |
| C9-C10             | 1.444           | 1.436                | 1.430                | 1.423                | 1.446                              |
| C10-C11            | 1.444           | 1.436                | 1.430                | 1.423                | 1.446                              |
| C11-C12            | 1.380           | 1.383                | 1.385                | 1.388                | 1.377                              |
| C12-C7             | 1.423           | 1.419                | 1.417                | 1.414                | 1.427                              |
| C10-O21            | 1.279           | 1.291                | 1.303                | 1.317                | 1.275                              |
| C4-N22             | 1.428           | 1.434                | 1.439                | 1.444                | 1.411                              |
| N22-O23            | 1.250           | 1.247                | 1.245                | 1.243                | 1.260                              |
| N22-O24            | 1.250           | 1.247                | 1.245                | 1.243                | 1.255                              |

<sup>a</sup>Structure geometries indicated by complex abbreviations are listed below.

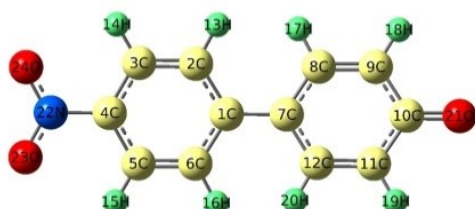

The hydrogen bond formed between the nitro group and water significantly shortens the bond lengths of C–N from 1.428 Å to 1.411 Å and C–C (bridge between two phenyl rings) from 1.456 Å to 1.449 Å. The shorter bond causes the stretching vibrations to shift to blue.

### Determination of the acidity ( $pK_a^*$ ) of ${}^3\text{NO}_2\text{-Bp-OH}$

The acid-base reaction in the triplet state of  $\text{NO}_2\text{-Bp-OH}$  can be accounted for by the following scheme, where  $\tau_0$  and  $\tau_0'$  denote the lifetimes of  ${}^3\text{NO}_2\text{-Bp-OH}$  and  ${}^3\text{NO}_2\text{-Bp-O}^-$  respectively,  $k_1$  and  $k_2$  the dissociation and protonation rate constants in the triplet state, respectively.

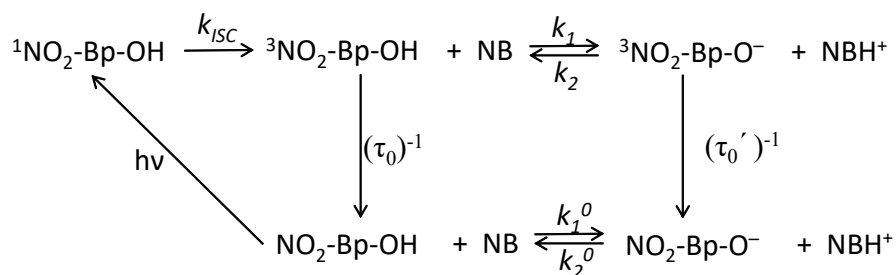

If we assume that the rates of proton transfer reactions ( $k_1[\text{NB}]$  and  $k_2[\text{NBH}^+]$ ) in the triplet state are very fast in comparison with the triplet decay rates  $(\tau_0)^{-1}$  and  $(\tau_0')^{-1}$ , respectively (that is, an acid-base equilibrium is established within the triplet lifetime), the following equations based on that proposed by Ware<sup>1</sup> can be applied to the present system. Where  $\tau$  denotes the observed triplet lifetime and  $K_a$  the equilibrium constant in the triplet, which is equal to  $k_1/k_2$ .

$$(\tau^{-1} - \tau_0^{-1})^{-1} = \{(\tau_0')^{-1} - \tau_0^{-1}\}^{-1} \left(1 + \frac{1}{[\text{NB}]} \times \frac{1}{K_a}\right)$$

Plot  $(\tau^{-1} - \tau_0^{-1})^{-1}$  as a function of  $[\text{NB}]^{-1}$  as following ( $\tau$  is the decay time constants at 650 nm for  ${}^3\text{NO}_2\text{-Bp-OH}$  when  $[\text{NB}] \geq 1.428$  mM in Table 2). Fit the plot by a linear function. From the slope and intercept, the value of  $K_a = \frac{\text{intercept}}{\text{slope}} = 22$  can be determined. Since the  $pK_a(\text{NB}) = 18.1$  in acetonitrile,<sup>2</sup> the  $pK_a^*({}^3\text{NO}_2\text{-Bp-OH})$  can be calculated to be 16.8.

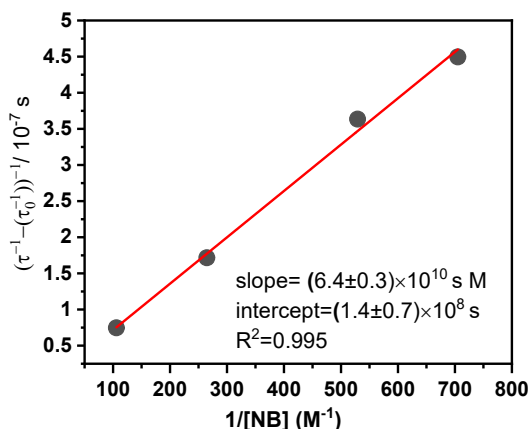

### References:

- (1) W. Ware, R. D. Watt and J. D. Holmes, *J. Am. Chem. Soc.*, 1974, **96**, 7853-7680.
- (2) B. G. Cox, *Acid and Bases: Solvent Effects on Acid-Base Strength*, Oxford University Press, Great Clarendon Street, Oxford, OX2 6DP, United Kingdom, 2013.
